# Supplementary material
Source: publisher figshare collection journal article supplement (https://acs.figshare.com/ndownloader/files/14157488)
Supplement: Supplementary file 1 [file 14157488]

## Supporting Information

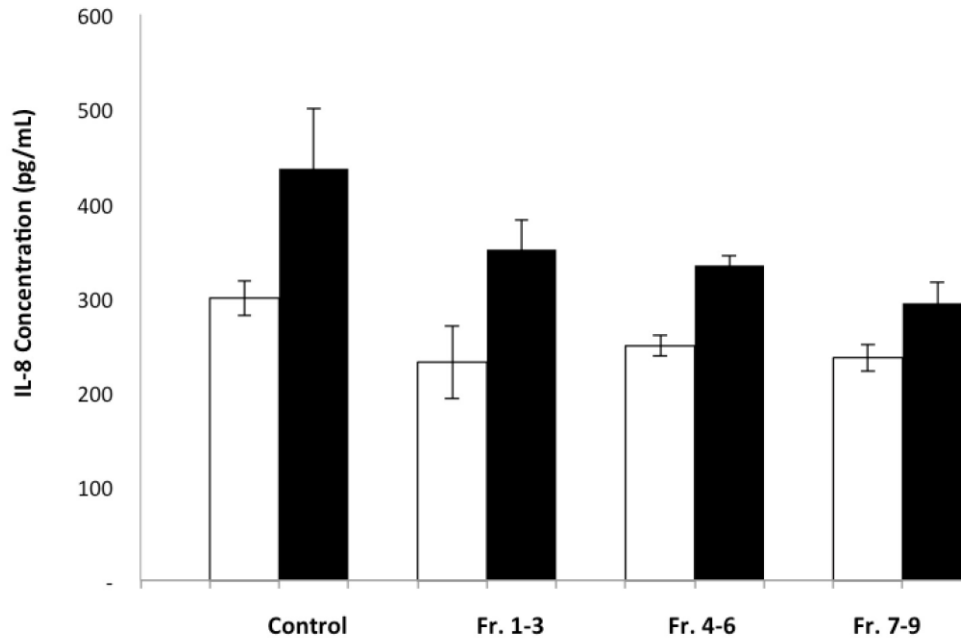

**Figure S1.** IL-8 inhibition by recombined Jaboticaba wood fractions at 100  $\mu\text{M/mL}$  in SAE cells untreated (open bars) and treated (bold bars) with cigarette smoke extract (CSE). Data are presented as mean values  $\pm$  95% confidence limits ( $n = 2$ ).
